# Supplementary material for: Tailoring Fe-doped Co3O4 nanoparticles via ultrasonic cell disruption: mechanistic insights and high-performance alkaline HER electrocatalysts
Source: Royal Society of Chemistry journal article supplement (doi:10.1039/d5ta02409a), 2025-01-01
Supplement: d5ta02409a1.pdf [file d5ta02409a1.pdf]

## Tailoring Fe-doped $\text{Co}_3\text{O}_4$ Nanoparticles via Ultrasonic Cell Disruption: Mechanistic Insights and High-Performance Alkaline HER Electrocatalysts

Mutian Zhang <sup>a,1</sup>, Ziying Ji <sup>b,1</sup>, Shijie Pan <sup>b</sup>, Xiang Liu <sup>a</sup>, Wei Zheng <sup>a</sup>, Jiajia Wang <sup>b,\*</sup>,  
Guobing Ying <sup>a,\*</sup>

a: School of Materials Science and Engineering, Southeast University, Nanjing, Jiangsu, 211189, China

b: College of Materials Science and Engineering, Hohai University, Nanjing, Jiangsu, 210098, China

1: The authors contribute equally to this work.

### Supplementary Information

**Table S1.** Hubbard U values of transition metal elements.

| Elements | U values (eV) | Ref.              |
|----------|---------------|-------------------|
| Co       | 4.7           | Our previous work |
| Fe       | 4.0           | 1                 |

The Conjugate Gradient (CG) geometric optimization algorithm was used until the force per atom was less than 0.02 eV / Å and the energy gap was less than  $1 \times 10^{-5}$  eV / atom until final convergence<sup>2</sup>.

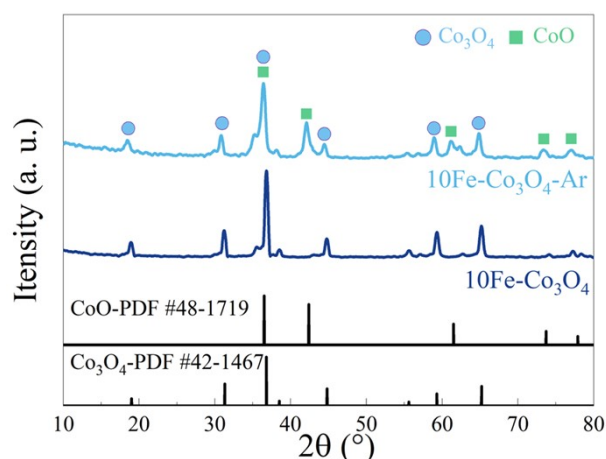

**Figure S1** XRD patterns of different annealing conditions of 10Fe- $\text{Co}_3\text{O}_4$  ( $\text{Co}_3\text{O}_4$ : JCPDS No. 42-1467, CoO: JCPDS No. 48-1719).

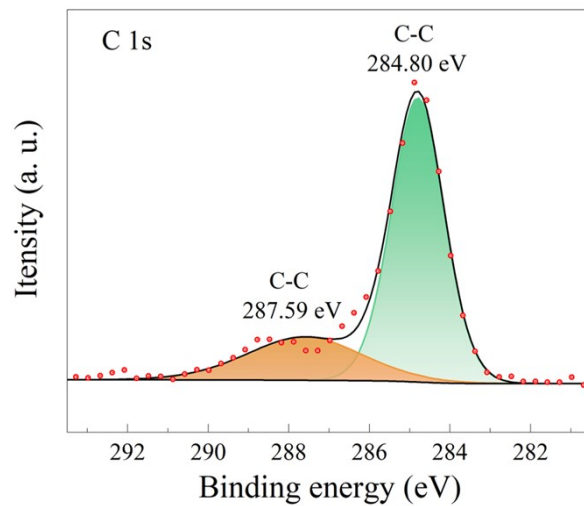

**Figure S2** XPS spectra of 10Fe-Co<sub>3</sub>O<sub>4</sub> of C 1s for charge correction.

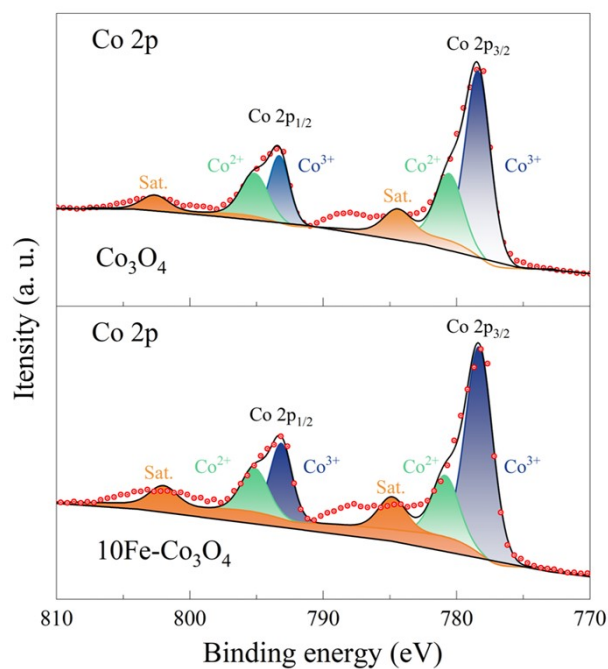

**Figure S3** XPS spectra of Co<sub>3</sub>O<sub>4</sub> and 10Fe-Co<sub>3</sub>O<sub>4</sub> of Co 2p.

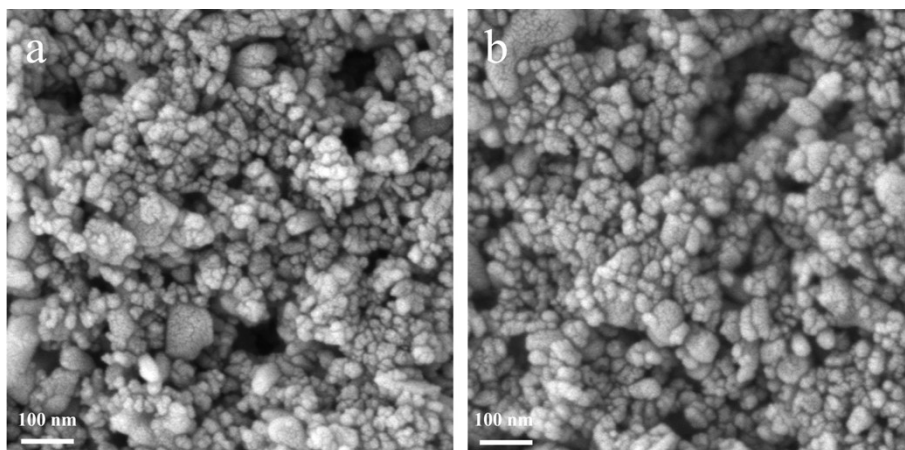

**Figure S4** SEM images of 10Fe-Co<sub>3</sub>O<sub>4</sub> UNPs prepared under different sonication conditions: a) 2 h treatment, (b) 4 h treatment.

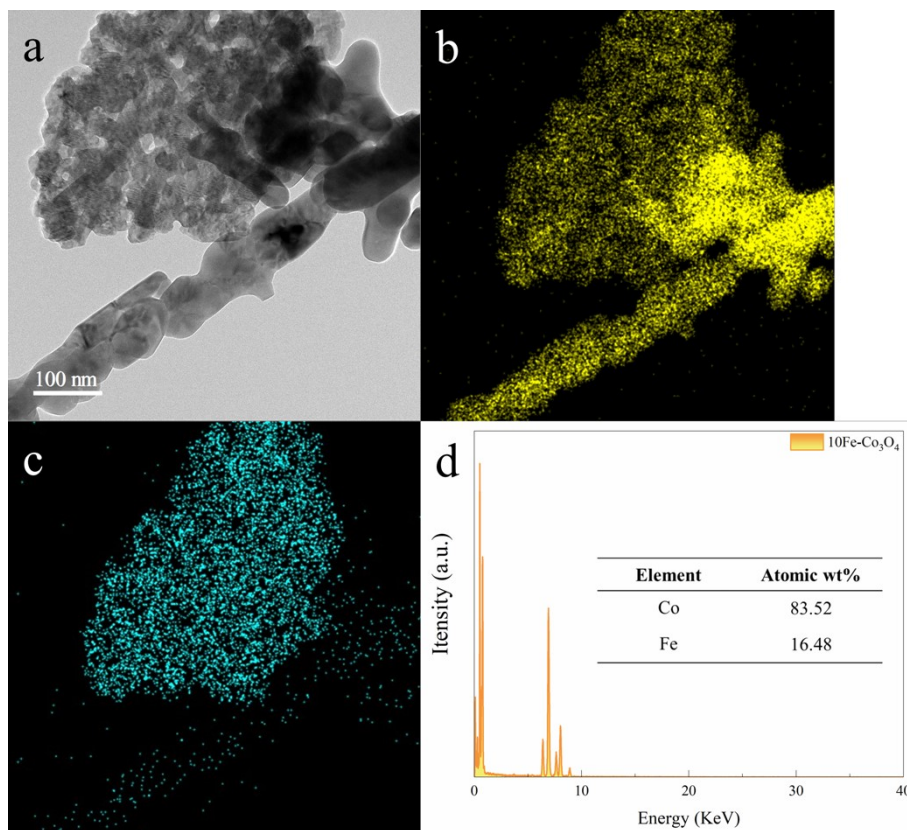

**Figure S5** (a)TEM image of 10Fe-Co<sub>3</sub>O<sub>4</sub> UNPs and TEM element mapping of Co (b), Fe (c), and EDS diagram of 10Fe-Co<sub>3</sub>O<sub>4</sub> UNPs.

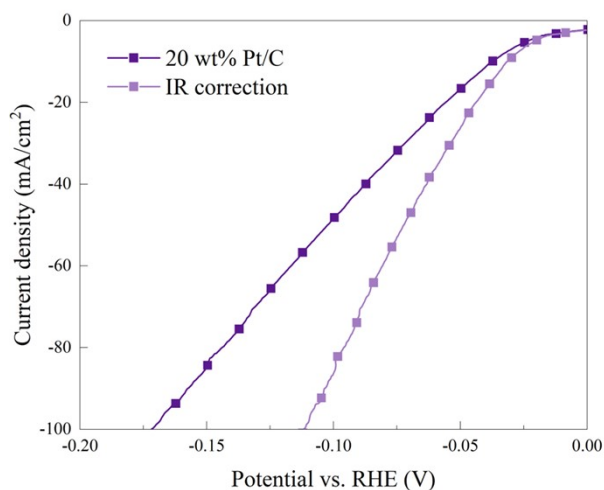

**Figure S6** LSV curves and IR-correction of Pt/C commercial catalysts (Pt 20 wt.%).  $\eta_{10} = 37.7$  mV, which is similar to the value of references<sup>3</sup>.

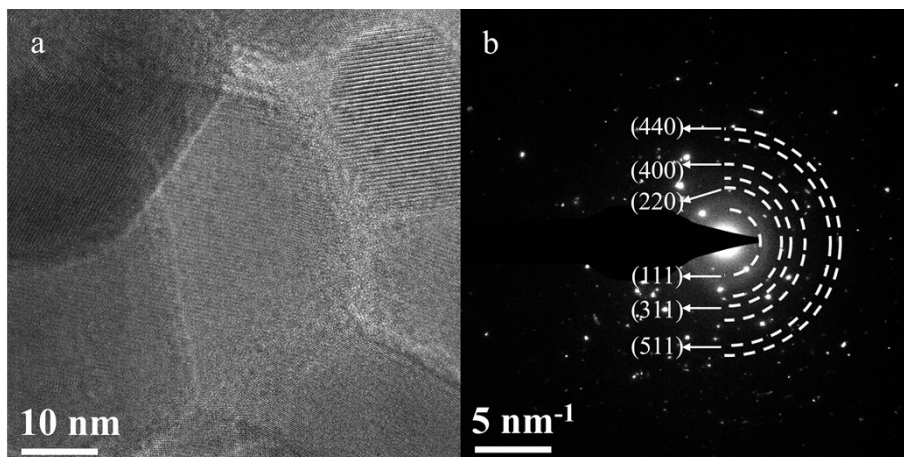

**Figure S7.** (a) HRTEM image and (b) SAED pattern of 10Fe-Co<sub>3</sub>O<sub>4</sub> UNPs after a 24-hour durability test at a current density of 100 mA/cm<sup>2</sup>. The observed diffraction rings in (b) originate from the conductive carbon powder and binder introduced during catalyst ink preparation.

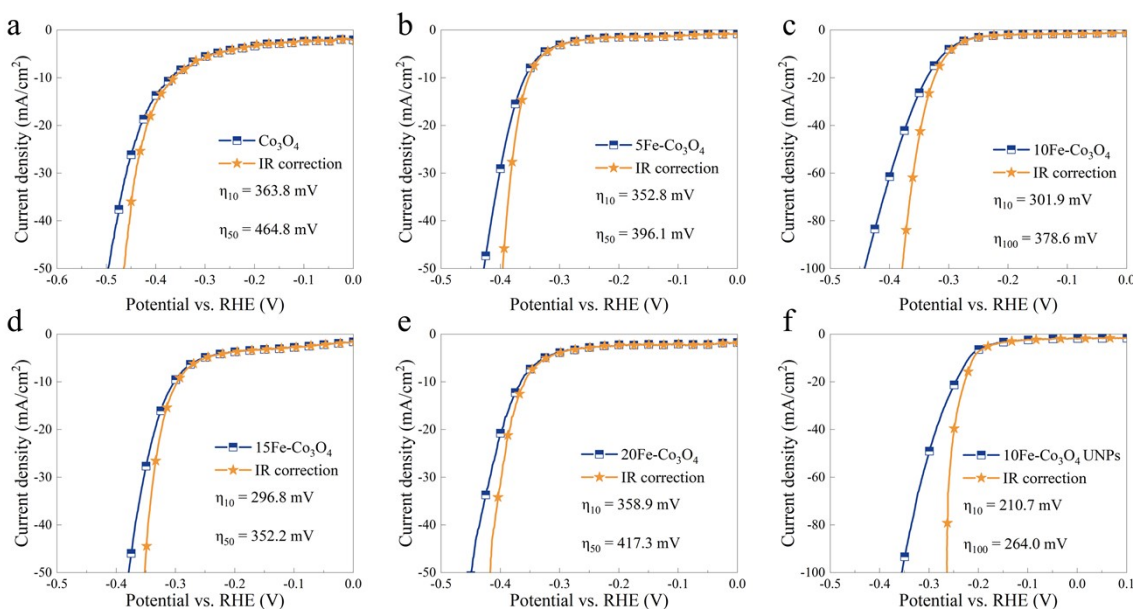

**Figure S8** LSV curves and IR-correction of Co<sub>3</sub>O<sub>4</sub> (a), 5Fe-Co<sub>3</sub>O<sub>4</sub> (b), 10Fe-Co<sub>3</sub>O<sub>4</sub> (c), 15Fe-Co<sub>3</sub>O<sub>4</sub> (d), 20Fe-Co<sub>3</sub>O<sub>4</sub> (e), and 10Fe-Co<sub>3</sub>O<sub>4</sub> UNPs (f).



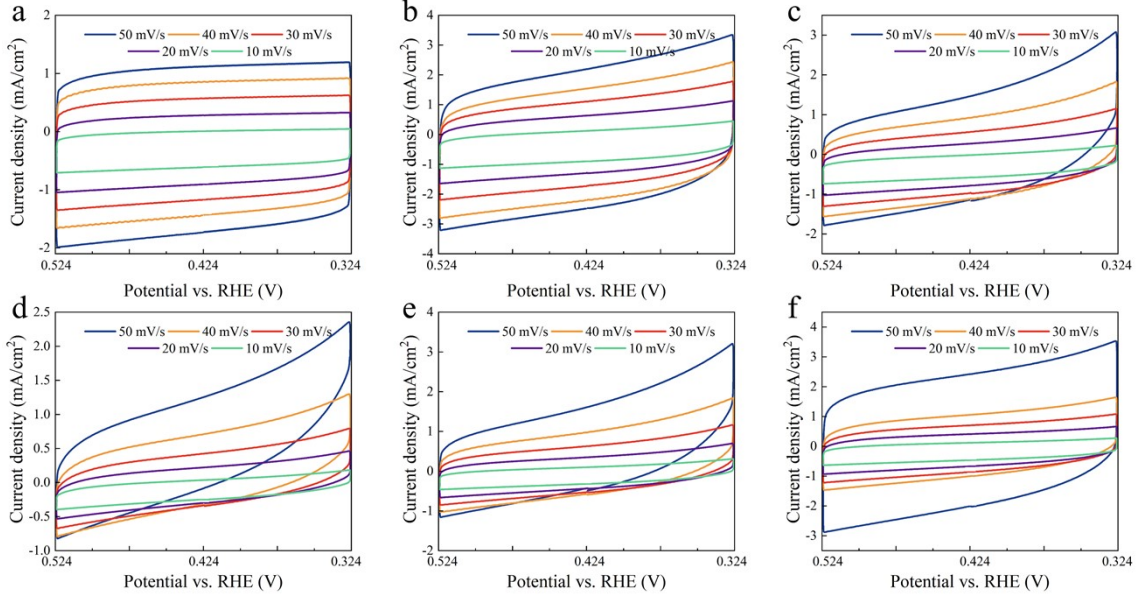

**Figure S9** CV curves of  $\text{Co}_3\text{O}_4$  (a),  $5\text{Fe-Co}_3\text{O}_4$  (b),  $10\text{Fe-Co}_3\text{O}_4$  (c),  $15\text{Fe-Co}_3\text{O}_4$  (d),  $20\text{Fe-Co}_3\text{O}_4$  (e), and  $10\text{Fe-Co}_3\text{O}_4$  UNPs (f).

To investigate the influence of Fe doping on the catalytic properties of the  $\text{Co}_3\text{O}_4$  (220) surface, we have expanded our DFT calculations to include a broader range of Fe doping concentrations. Specifically, we now consider five doping levels: undoped (0%) and doping ratios of 5%, 10%, 15%, and 20%, resulting in a total of 11 models, and the 10 doped models are shown in Fig. S9.

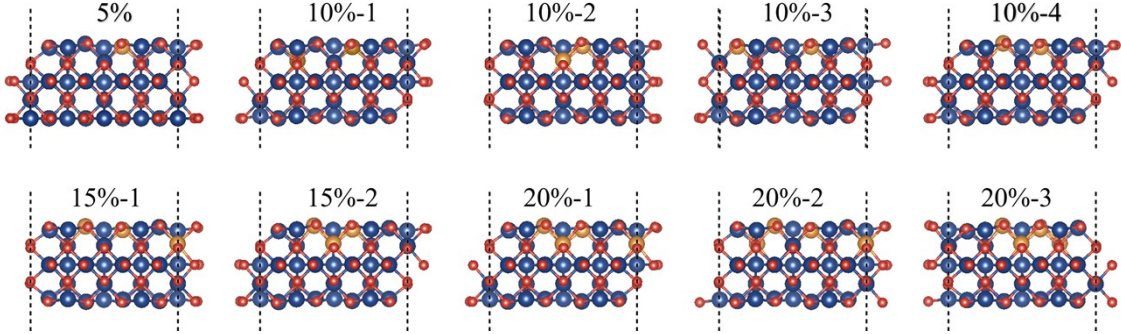

**Figure S10** Side view of 10 different Fe-doping ratio (220) surface models of  $\text{Co}_3\text{O}_4$ .

For these models, we calculated both the formation energies and the water adsorption energies on their surfaces. The formation energy ( $E_{form}$ ) for Fe doping in  $\text{Co}_3\text{O}_4$  is calculated as:

$$E_{form} = \frac{1}{n} [E_{SlabFe-Co_3O_4} - E_{SlabCo_3O_4} + n\mu_{Co} - n\mu_{Fe}] \quad (1)$$

Where  $E_{SlabFe-Co_3O_4}$  is defined as the total energy of the Fe-Co<sub>3</sub>O<sub>4</sub> slab,  $E_{SlabCo_3O_4}$  is defined as the total energy of the Co<sub>3</sub>O<sub>4</sub> slab, n is the number of substituted Fe atoms,  $\mu_{Co}$  and  $\mu_{Fe}$  are the chemical potential of Co and Fe, calculated by their bulk free energy.

The adsorption energy( $E_{ads}$ ) is defined as<sup>4</sup>:

$$E_{ads} = E_{slab@H_2O} - [E_{slab} + E_{H_2O}] \quad (2)$$

Where  $E_{slab@H_2O}$ ,  $E_{slab}$  and  $E_{H_2O}$  represent the total energy of the system after the adsorption of water molecules, the energy of the system before the adsorption of water molecules and the energy of the water molecules, respectively. The absolute value of  $E_{ads}$  signifies the adsorption capacity of this adsorption behaviour of the system for water molecules. The corresponding data are provided in Table S2.

**Table S2** The formation energy (eV) and adsorption energy (eV) of different Fe-doping ratio structures.

| Structure | $E_{form}$ (eV) | $E_{ads}$ (eV) |
|-----------|-----------------|----------------|
| 0%        | 0               | -2.18          |
| 5%        | 0.68            | -2.73          |
| 10%-1     | 3.17            | -2.65          |
| 10%-2     | 2.80            | -2.76          |
| 10%-3     | 3.12            | -2.84          |
| 10%-4     | 3.26            | -3.05          |
| 15%-1     | 3.51            | -2.98          |
| 15%-2     | 3.48            | -2.99          |
| 20%-1     | 4.22            | -3.01          |
| 20%-2     | 5.70            | -3.10          |
| 20%-3     | 6.10            | -3.05          |

To facilitate a more intuitive comparison, we have also presented the results graphically in Fig. S10. As illustrated, with increasing doping concentration, the formation energy rises, indicating that higher doping concentrations make the material harder to synthesize. At the same time, the water adsorption energy decreases, suggesting that higher doping concentrations are more favourable for water adsorption.

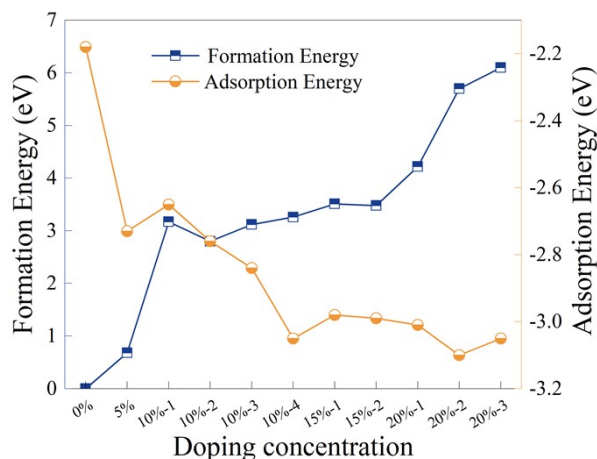

**Figure S11** The formation energy and adsorption energy of different Fe-doping ratio structures.

The increasing formation energy and decreasing adsorption energy present a trade-off, implying that an optimal doping concentration is necessary. Based on the results from Fig. S10, we find that doping concentrations of 5% and 10% strike a good balance between ease of doping and water adsorption capability. Among these, we specifically chose the 10%-4 model for further analysis, as it exhibited the strongest water adsorption energy within the 10% doping group while maintaining a formation energy close to that of other models at this doping level. This makes the 10%-4 model particularly promising for HER applications, as it provides a good balance between water adsorption efficiency and doping feasibility. Therefore, we focus on these two doping levels in the main manuscript, where we refer to them as Single-Fe Co<sub>3</sub>O<sub>4</sub> (5%) and Double-Fe Single-Fe Co<sub>3</sub>O<sub>4</sub> (10%-4) for further calculation.

**Table S3** Average Bader charge population ( $|e|$ ) of surface-active sites on the (220) surface of Co<sub>3</sub>O<sub>4</sub>, Single Fe-Co<sub>3</sub>O<sub>4</sub> and Double Fe-Co<sub>3</sub>O<sub>4</sub>.

| System                         | Co <sup>3+</sup> | Fe <sup>3+</sup> | O     |
|--------------------------------|------------------|------------------|-------|
| Co <sub>3</sub> O <sub>4</sub> | 7.902            | /                | 6.928 |

|                                          |       |       |       |
|------------------------------------------|-------|-------|-------|
| Single Fe-Co <sub>3</sub> O <sub>4</sub> | 7.850 | 6.590 | 7.035 |
| Double Fe-Co <sub>3</sub> O <sub>4</sub> | 7.820 | 6.455 | 7.075 |

**Table S4** Average Bader charge transfer ( $|e|$ ) of surface-active sites on the (220) surface of Co<sub>3</sub>O<sub>4</sub>, Single Fe-Co<sub>3</sub>O<sub>4</sub> and Double Fe-Co<sub>3</sub>O<sub>4</sub>.

| System                                   | Co <sup>3+</sup> | Fe <sup>3+</sup> | O      |
|------------------------------------------|------------------|------------------|--------|
| Co <sub>3</sub> O <sub>4</sub>           | +1.098           | /                | -0.928 |
| Single Fe-Co <sub>3</sub> O <sub>4</sub> | +1.150           | +1.410           | -1.035 |
| Double Fe-Co <sub>3</sub> O <sub>4</sub> | +1.180           | +1.545           | -1.075 |

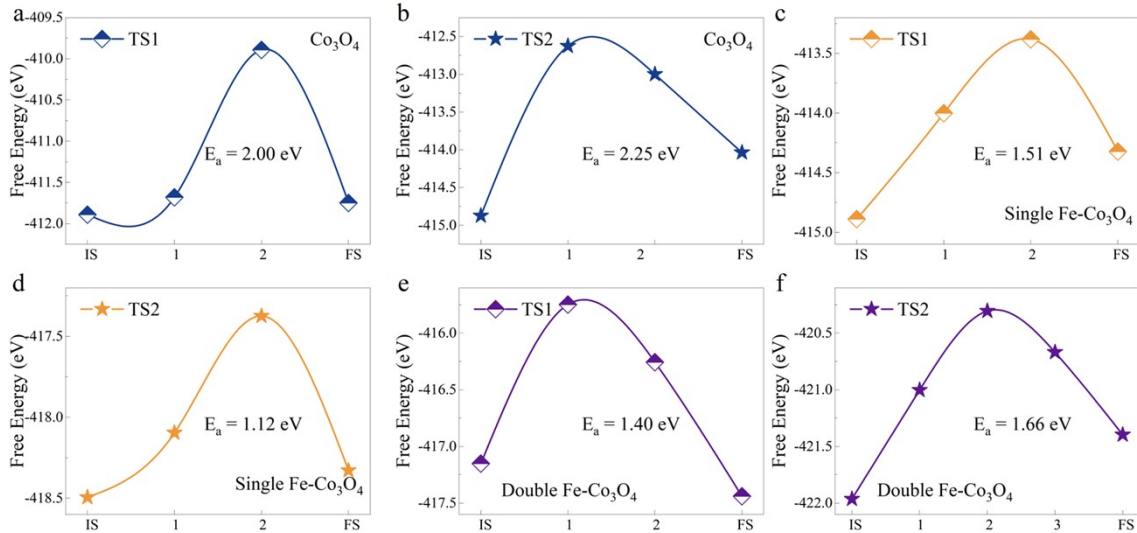

**Figure S12** (a)(b) The two step energy barriers of water splitting on the (220) surface of Co<sub>3</sub>O<sub>4</sub>; (c)(d) The two step energy barriers of water splitting on the (220) surface of Single Fe-Co<sub>3</sub>O<sub>4</sub>; (e)(f) The two step energy barriers of water splitting on the (220) surface of Double Fe-Co<sub>3</sub>O<sub>4</sub>.

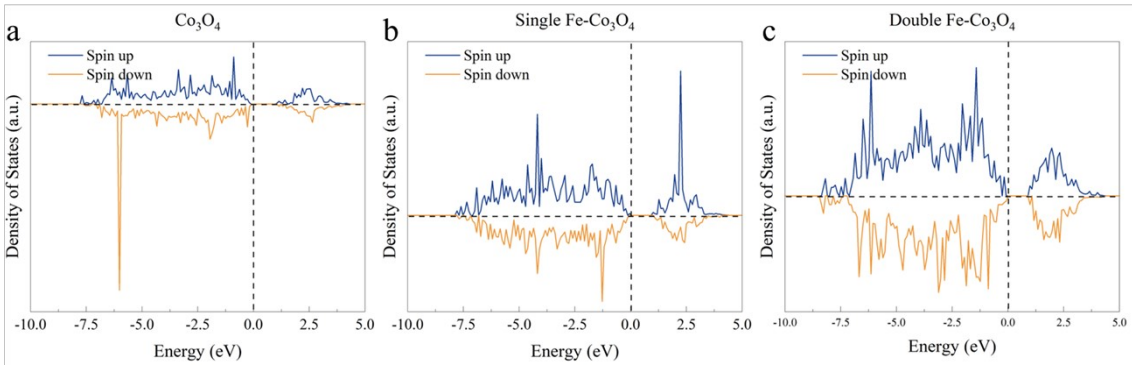



---

**Figure S13** The total density of states of the (220) surface of  $\text{Co}_3\text{O}_4$  (a), Single Fe- $\text{Co}_3\text{O}_4$  (b) and Double Fe- $\text{Co}_3\text{O}_4$  (c).

$\varepsilon_d$  are obtained by Vaspkit software<sup>5</sup>.

---

## References

1. P. Yoo and P. Liao, *Appl. Surf. Sci.*, 2023, **630**, 157501.
2. Y. Cao, K.-C. Leung and V. O. K. Li, *Ieee Transactions on Wireless Communications*, 2008, **7**, 2094-2105.
3. L. Hou, Z. Li, H. Jang, M. G. Kim, J. Cho, W. Zhong, s. Liu and X. Liu, *Angew. Chem., Int. Ed.*, 2024, e202423756.
4. J. Chen and A. Selloni, *The Journal of Physical Chemistry Letters*, 2012, **3**, 2808-2814.
5. V. Wang, N. Xu, J.-C. Liu, G. Tang and W.-T. Geng, *Comput. Phys. Commun.*, 2021, **267**, 108033.
